# Supplementary material for: Phylogeny and classification of the East Asian Amitostigma alliance (Orchidaceae: Orchideae) based on six DNA markers
Source: PubMed Central journal article supplement (PMC4479074; doi:10.1186/s12862-015-0376-3), 2015-05-26
Supplement: 12862_2015_376_MOESM6_ESM.pdf [file 12862_2015_376_MOESM6_ESM.pdf]

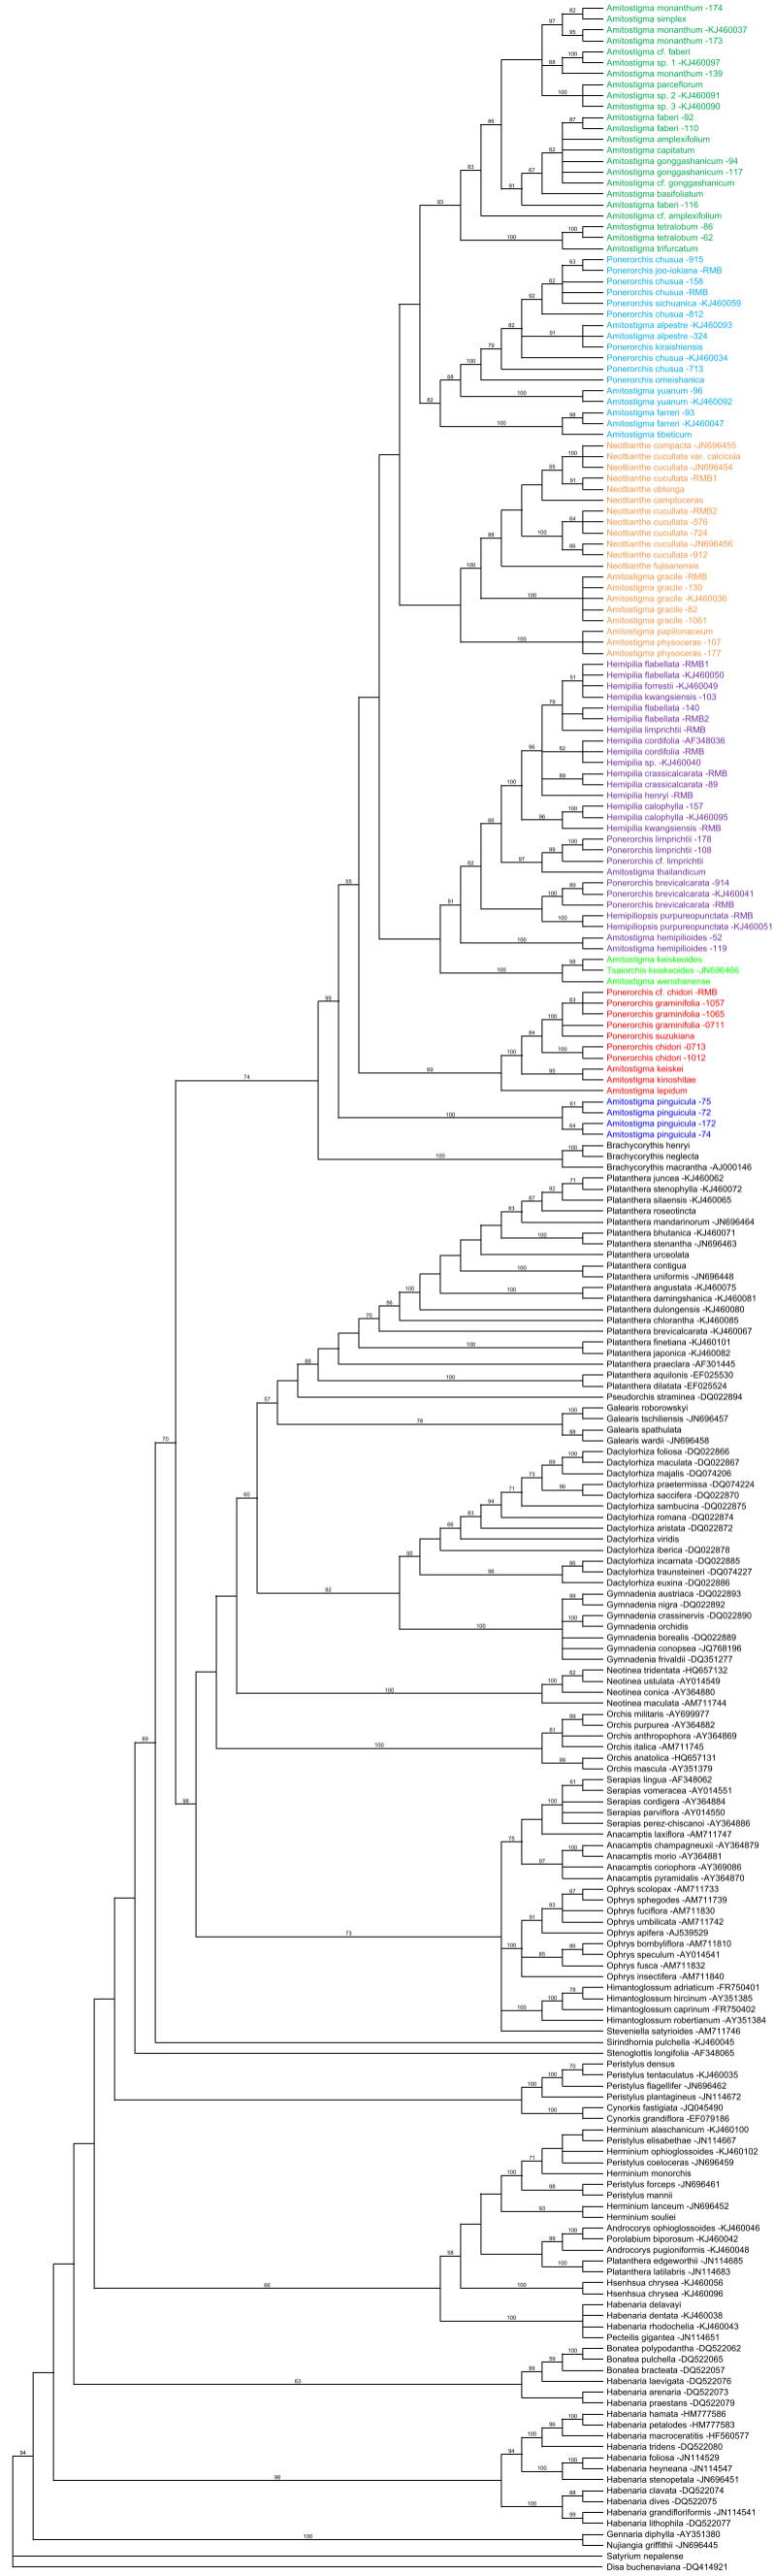

Amitostigma monanthum -174  
Amitostigma simplex  
Amitostigma monanthum -KJ460037  
Amitostigma monanthum -173  
Amitostigma cf. faberi  
Amitostigma sp. 1 -KJ460097  
Amitostigma monanthum -139  
Amitostigma parveforium  
Amitostigma sp. 2 -KJ460091  
Amitostigma sp. 3 -KJ460090  
Amitostigma faberi -92  
Amitostigma faberi -110  
Amitostigma amplexifolium  
Amitostigma capitatum  
Amitostigma gonggashanicum -94  
Amitostigma gonggashanicum -117  
Amitostigma cf. gonggashanicum  
Amitostigma basifoliatum  
Amitostigma faberi -116  
Amitostigma cf. amplexifolium  
Amitostigma tetralobum -86  
Amitostigma tetralobum -82  
Amitostigma trifurcatum  
Ponerorchis chusua -915  
Ponerorchis joo-ikiana -RMB  
Ponerorchis chusua -153  
Ponerorchis chusua -RMB  
Ponerorchis sichuanica -KJ460059  
Ponerorchis chusua -812  
Amitostigma alpestre -KJ460093  
Amitostigma alpestre -324  
Ponerorchis kraehiana  
Ponerorchis chusua -KJ460034  
Ponerorchis chusua -713  
Ponerorchis omeishanica  
Amitostigma yuenum -96  
Amitostigma yuenum -KJ460092  
Amitostigma farrei -83  
Amitostigma farrei -KJ460047  
Amitostigma libeticum  
Neottianthe compacta -JN696455  
Neottianthe cucullata var. calicicola  
Neottianthe cucullata -JN696454  
Neottianthe cucullata -RMB1  
Neottianthe oblonga  
Neottianthe camploceras  
Neottianthe cucullata -RMB2  
Neottianthe cucullata -576  
Neottianthe cucullata -724  
Neottianthe cucullata -JN696456  
Neottianthe cucullata -912  
Neottianthe fujianensis  
Amitostigma gracile -RMB  
Amitostigma gracile -130  
Amitostigma gracile -KJ460036  
Amitostigma gracile -82  
Amitostigma gracile -1061  
Amitostigma papilionaceum  
Amitostigma physoceras -107  
Amitostigma physoceras -177  
Hemipilia fabelata -RMB1  
Hemipilia fabelata -KJ460050  
Hemipilia forrestii -KJ460049  
Hemipilia kwangsiensis -103  
Hemipilia fabelata -140  
Hemipilia fabelata -RMB2  
Hemipilia limprichtii -RMB  
Hemipilia cordifolia -AF348036  
Hemipilia cordifolia -RMB  
Hemipilia sp. -KJ460040  
Hemipilia crassicalcarata -RMB  
Hemipilia crassicalcarata -89  
Hemipilia henryi -RMB  
Hemipilia calophylla -157  
Hemipilia calophylla -KJ460095  
Hemipilia kwangsiensis -RMB  
Ponerorchis limprichtii -178  
Ponerorchis limprichtii -08  
Ponerorchis cf. limprichtii  
Amitostigma thalaidicum  
Ponerorchis brevicarata -914  
Ponerorchis brevicarata -KJ460041  
Ponerorchis brevicarata -RMB  
Hemipilopsis purpureopunctata -RMB  
Hemipilopsis purpureopunctata -KJ460051  
Amitostigma hempioides -52  
Amitostigma hempioides -119  
Amitostigma keiskeoides  
Amitostigma keiskeoides -JN696466  
Amitostigma wenshanense  
Ponerorchis cf. chidori -RMB  
Ponerorchis graminifolia -1057  
Ponerorchis graminifolia -1065  
Ponerorchis graminifolia -0711  
Ponerorchis suzukiensis  
Ponerorchis chidori -0713  
Ponerorchis chidori -1012  
Amitostigma keiskei  
Amitostigma kinoshitae  
Amitostigma lepium  
Amitostigma pinguicula -75  
Amitostigma pinguicula -72  
Amitostigma pinguicula -172  
Amitostigma pinguicula -74  
Brachycorythis henryi  
Brachycorythis neglecta  
Brachycorythis macrantha -AJ000146  
Platanthera juncea -KJ460062  
Platanthera stenophylla -KJ460072  
Platanthera silaensis -KJ460065  
Platanthera roseolincta  
Platanthera mandarinorum -JN696464  
Platanthera bhutanica -KJ460071  
Platanthera stenantha -JN696463  
Platanthera urceolata  
Platanthera conigua  
Platanthera uniformis -JN696448  
Platanthera angustata -KJ460075  
Platanthera damingshanica -KJ460081  
Platanthera dulongensis -KJ460080  
Platanthera chlorantha -KJ460085  
Platanthera brevicarata -KJ460067  
Platanthera finlayana -KJ460101  
Platanthera japonica -KJ460082  
Platanthera praecleara -AF301445  
Platanthera aquilonis -EF025530  
Platanthera dilatata -EF025524  
Pseudorchis straminea -DQ022894  
Galearis robotowskyi  
Galearis tschiliensis -JN696457  
Galearis spatulata  
Galearis wardii -JN696458  
Dactylorhiza foliosa -DQ022866  
Dactylorhiza maculata -DQ022867  
Dactylorhiza majalis -DQ074206  
Dactylorhiza praetermissa -DQ074224  
Dactylorhiza sacifera -DQ022870  
Dactylorhiza sambucina -DQ022875  
Dactylorhiza romana -DQ022874  
Dactylorhiza aristata -DQ022872  
Dactylorhiza viridis  
Dactylorhiza berica -DQ022878  
Dactylorhiza incamata -DQ022885  
Dactylorhiza traunsteineri -DQ074227  
Dactylorhiza exima -DQ022886  
Gymnadenia austriaca -DQ022893  
Gymnadenia nigra -DQ022892  
Gymnadenia crassinervis -DQ022890  
Gymnadenia orchidis  
Gymnadenia borealis -DQ022889  
Gymnadenia conopsea -JQ768196  
Gymnadenia frivaldi -DQ025127  
Neoliparis tridentata -HQ657132  
Neoliparis ustulata -AY014549  
Neoliparis conica -AY364880  
Neoliparis maculata -AM711744  
Orchis militaris -AY699977  
Orchis purpurea -AY364882  
Orchis anthropophora -AY364869  
Orchis italica -AM711745  
Orchis anatolica -HQ657131  
Orchis mascula -AY351379  
Serapias lingua -AF348062  
Serapias vomeracea -AY014551  
Serapias cordigera -AY364884  
Serapias parviflora -AY014550  
Serapias perez-chiscanoi -AY364886  
Anacamptis laxiflora -AM711747  
Anacamptis champagnouxii -AY364879  
Anacamptis morio -AY364881  
Anacamptis coriophora -AY369086  
Anacamptis pyramidalis -AY364870  
Ophrys scolopax -AM711733  
Ophrys sphegodes -AM711739  
Ophrys fucifera -AM711830  
Ophrys umbilicata -AM711742  
Ophrys apifera -AJ539529  
Ophrys bombyliflora -AM711810  
Ophrys speculum -AY014541  
Ophrys fusca -AM711832  
Ophrys insectifera -AM711840  
Himantoglossum adriaticum -FR750401  
Himantoglossum hircinum -AY351385  
Himantoglossum caprinum -FR750402  
Himantoglossum robertianum -AY351384  
Stenvenilia satyroides -AM711748  
Sirindhornia pulchella -KJ460045  
Stenoglossum longifolia -AF348065  
Peristylus densus  
Peristylus tentaculatus -KJ460035  
Peristylus flagellifer -JN696452  
Peristylus plantagineus -JN114672  
Cynorkis fastigiata -JQ045490  
Cynorkis grandiflora -EF079186  
Hermidium alaschanicum -KJ460100  
Peristylus ellisabellae -JN114667  
Hermidium ophioglossoides -KJ460102  
Peristylus coeloceras -JN696459  
Hermidium monorchis  
Peristylus forceps -JN696461  
Peristylus manni  
Hermidium lanceum -JN696452  
Hermidium scouleri  
Androcorys ophioglossoides -KJ460046  
Porolabium biporosum -KJ460042  
Androcorys pugioniformis -KJ460048  
Platanthera edgeworthii -JN114685  
Platanthera latilabris -JN114683  
Hsenhaua chrysea -KJ460066  
Hsenhaua chrysea -KJ460096  
Habenaria delavayi  
Habenaria dentata -KJ460038  
Habenaria rhodochelia -KJ460043  
Pactelia gigantea -JN114651  
Bonatea polydanthia -DQ522062  
Bonatea pulchella -DQ522065  
Bonatea bracteata -DQ522057  
Habenaria laevigata -DQ522076  
Habenaria arenaria -DQ522073  
Habenaria praestans -DQ522079  
Habenaria hamata -HM777586  
Habenaria petalodes -HM777583  
Habenaria macroceratitis -HF560577  
Habenaria tridens -DQ522080  
Habenaria foliosa -JN114629  
Habenaria heyneana -JN114547  
Habenaria stenopetala -JN696451  
Habenaria clavata -DQ522074  
Habenaria dives -DQ522075  
Habenaria grandifloriformis -JN114541  
Habenaria lithophilis -DQ522077  
Cennaria diphylla -AY351380  
Nujangia griffithii -JN696445  
Satyrium nepalense  
Disa buchenaviana -DQ414921
