# Supplementary material for: Phylogeny and classification of the East Asian Amitostigma alliance (Orchidaceae: Orchideae) based on six DNA markers
Source: PubMed Central journal article supplement (PMC4479074; doi:10.1186/s12862-015-0376-3), 2015-05-26

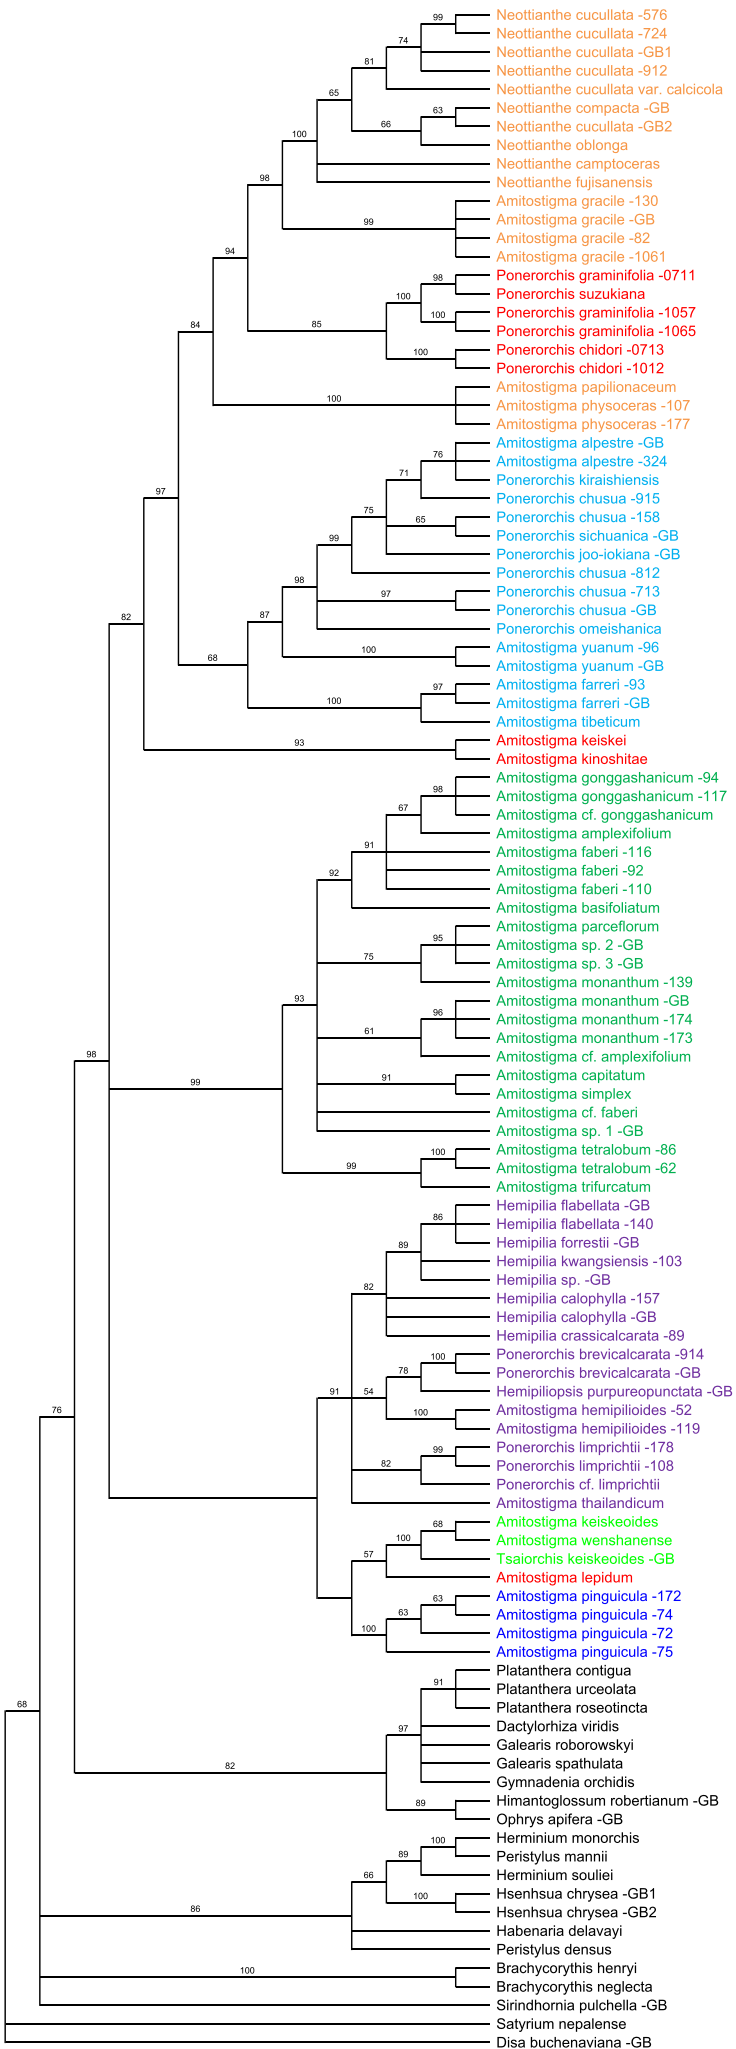

Supplement: 12862_2015_376_MOESM10_ESM.pdf [file 12862_2015_376_MOESM10_ESM.pdf]
